# Supplementary material
Source: publisher site journal article supplement (https://www.dovepress.com/article/556852)
Supplement: Supplementary file 1 [file 556852%20Supplementary%20Table%20S1.docx]

**Supplemental**

*Table S1. Progestin generation, brand names of each hormonal formulation, and number of prescriptions during the study period.*

| **Hormonal Formulation** | **Progestin Generation** | **Products** | **Total Prescriptions During Study Period** |
| --- | --- | --- | --- |
| Norethindrone (NET) | 1st | Camila  Errin  Jolivette  Lyza  Nora-BE  Nor-QD  Ortho Micronor | 4,994,240 |
| EE/Norethindrone acetate (NETA) | 1st | Femhrt 15  Femhrt Lo  Gildess 1530  Jevantique  Jinteli  Junel 120  Junel 1530  Larin 120  Loestrin 120  Loestrin 1530  Microgestin 120  Microgestin 1530 | 15,326,747 |
| EE/Levonorgestrel (LNG) | 2nd | Alesse  Alesse-28  Altavera  Amethia  Amethia Lo  Aviane  Camrese  CamreseLo  Enpresse  Introvale  Jolessa  Lessina | 6,702,061 |
| EE/Desogestrel (DSG) | 3rd | Apri  Caziant  Cesia  Cyclessa  Desogen  Enskyce  Kariva  Mircette  Ortho-Cept  Reclipsen  Solia  Velivet | 4,892,161 |
| EE/ Norgestimate (NRG) | 3rd | Estarylla  MonoNessa  Ortho-Cyclen  Ortho Tri-Cyclen  Ortho Tri-Cyclen Lo  Previfem  Sprintec  Tri-Lo-Sprintec  TriNessa  TriNessa 28  Tri-Previfem  Tri-Sprintec | 11,652,059 |
| EE/Drospirenone (DRSP) | 4th | Gianvi  Loryna  Nikki  Ocella  Syeda  Vestura  Yasmin  YAZ  Yaz 28  Zarah | 5,372,784 |
